# Supplementary material for: Insight into emission-tuning and luminescence thermal quenching investigations in NaLa1−xGdxCa4W2O12:Mn4+ phosphors via the ionic couple substitution of Na+ + Ln3+ (Ln = La, Gd) for 2Ca2+ in Ca6W2O12:Mn4+ for plant-cultivation LED applications
Source: Royal Society of Chemistry journal article supplement (doi:10.1039/c9dt02796c), 2019-01-01
Supplement: c9dt02796c1.pdf [file c9dt02796c1.pdf]

## Supporting Information

### Insight into the emission-tuning and luminescence thermal quenching investigations in $\text{NaLa}_{1-x}\text{Gd}_x\text{Ca}_4\text{W}_2\text{O}_{12}:\text{Mn}^{4+}$ phosphors via the ionic couple substitution of $\text{Na}^+ + \text{Ln}^{3+}$ ( $\text{Ln} = \text{La}, \text{Gd}$ ) for $2\text{Ca}^{2+}$ in $\text{Ca}_6\text{W}_2\text{O}_{12}:\text{Mn}^{4+}$ for plant-cultivation LED application

Kai Li\* and Rik Van Deun

L<sup>3</sup>-Luminescent Lanthanide Lab, Department of Chemistry, Ghent University, Krijgslaan 281-S3, B-9000 Ghent, Belgium

\*Corresponding author: Kai Li (kailiac@126.com)

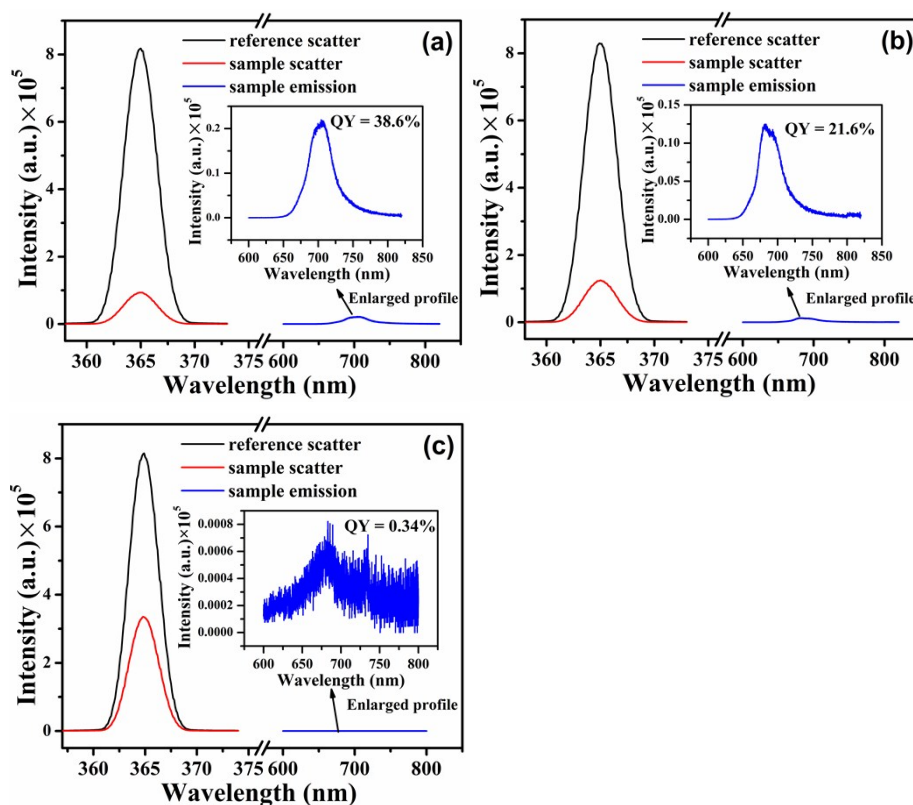

**Fig. S1** The reference, sample absorption and sample emission for calculating quantum yield (QY) for NLCWO:0.01Mn<sup>4+</sup> (a), NGCWO:0.01Mn<sup>4+</sup> (b) and CWO:0.01Mn<sup>4+</sup> (c) samples under 365 nm excitation.

**Table S1** Detailed crystallographic data of refinement parameters for the CWO, NLCWO, and NGCWO samples.

| Sample                                                    | CWO            | NLCWO          | NGCWO          |
|-----------------------------------------------------------|----------------|----------------|----------------|
| <b>Space group</b>                                        | <i>P121/c1</i> | <i>P121/c1</i> | <i>P121/c1</i> |
| <b>Symmetry</b>                                           | monoclinic     | monoclinic     | monoclinic     |
| <b>a, Å</b>                                               | 5.5467(3)      | 5.5783(4)      | 5.5416(4)      |
| <b>b, Å</b>                                               | 5.8033(2)      | 5.8143(3)      | 5.7924(3)      |
| <b>c, Å</b>                                               | 9.7243(5)      | 9.7889(5)      | 9.7592(7)      |
| <b>V, Å<sup>3</sup></b>                                   | 257.65(2)      | 260.95(2)      | 257.47(3)      |
| <b>Z</b>                                                  | 2              | 2              | 2              |
| <b><math>\alpha = \gamma, ^\circ</math></b>               | 90             | 90             | 90             |
| <b><math>\beta</math></b>                                 | 124.6          | 124.7          | 124.7          |
| <b>2<math>\theta</math>-interval, <math>^\circ</math></b> | 5-90           | 5-90           | 5-90           |
| <b>R<sub>wp</sub>/%</b>                                   | 12.56%         | 12.78          | 11.32          |
| <b>R<sub>p</sub>/%</b>                                    | 9.63%          | 9.92           | 8.87           |
| <b><math>\chi^2</math></b>                                | 1.887          | 1.663          | 1.407          |
